# Supplementary material for: Wild grapes of Armenia: unexplored source of genetic diversity and disease resistance
Source: PubMed Central journal article supplement (PMC10739323; doi:10.3389/fpls.2023.1276764), 2023-12-08

Absolute value of the 2nd order rate of change of the likelihood distribution (mean)

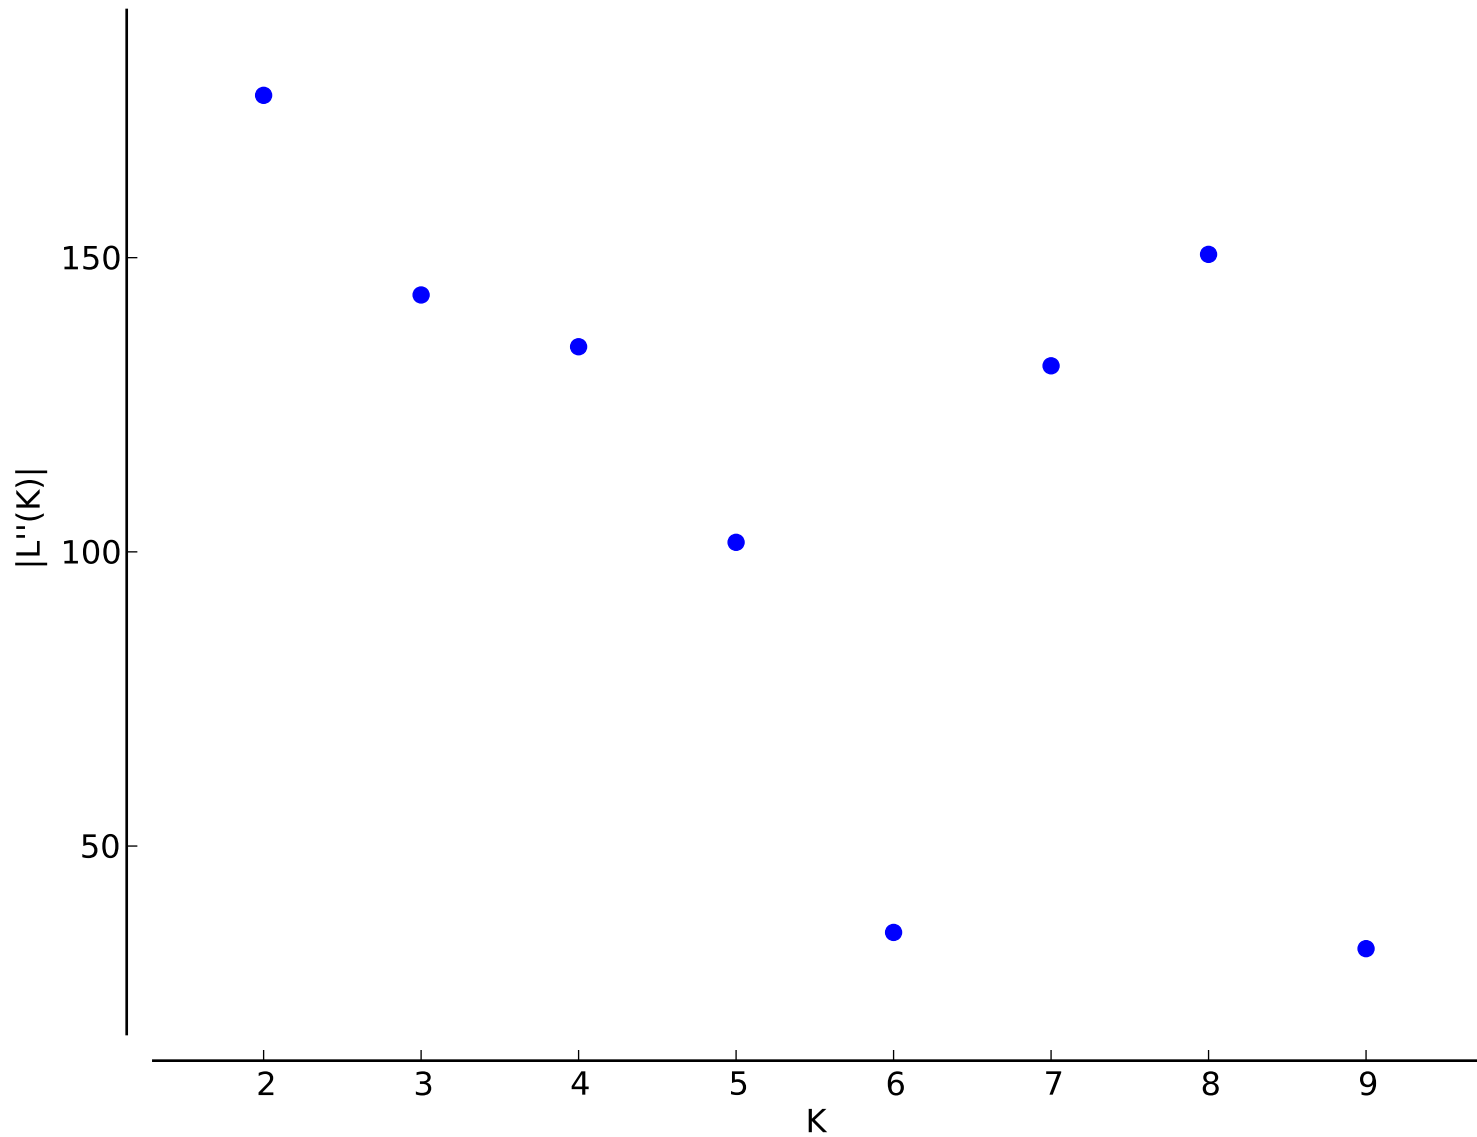

Supplement: DataSheet_1.pdf [file DataSheet_1.pdf]
