# Supplementary material for: Wild grapes of Armenia: unexplored source of genetic diversity and disease resistance
Source: PubMed Central journal article supplement (PMC10739323; doi:10.3389/fpls.2023.1276764), 2023-12-08

$$\text{DeltaK} = \text{mean}(|L''(K)|) / \text{sd}(L(K))$$

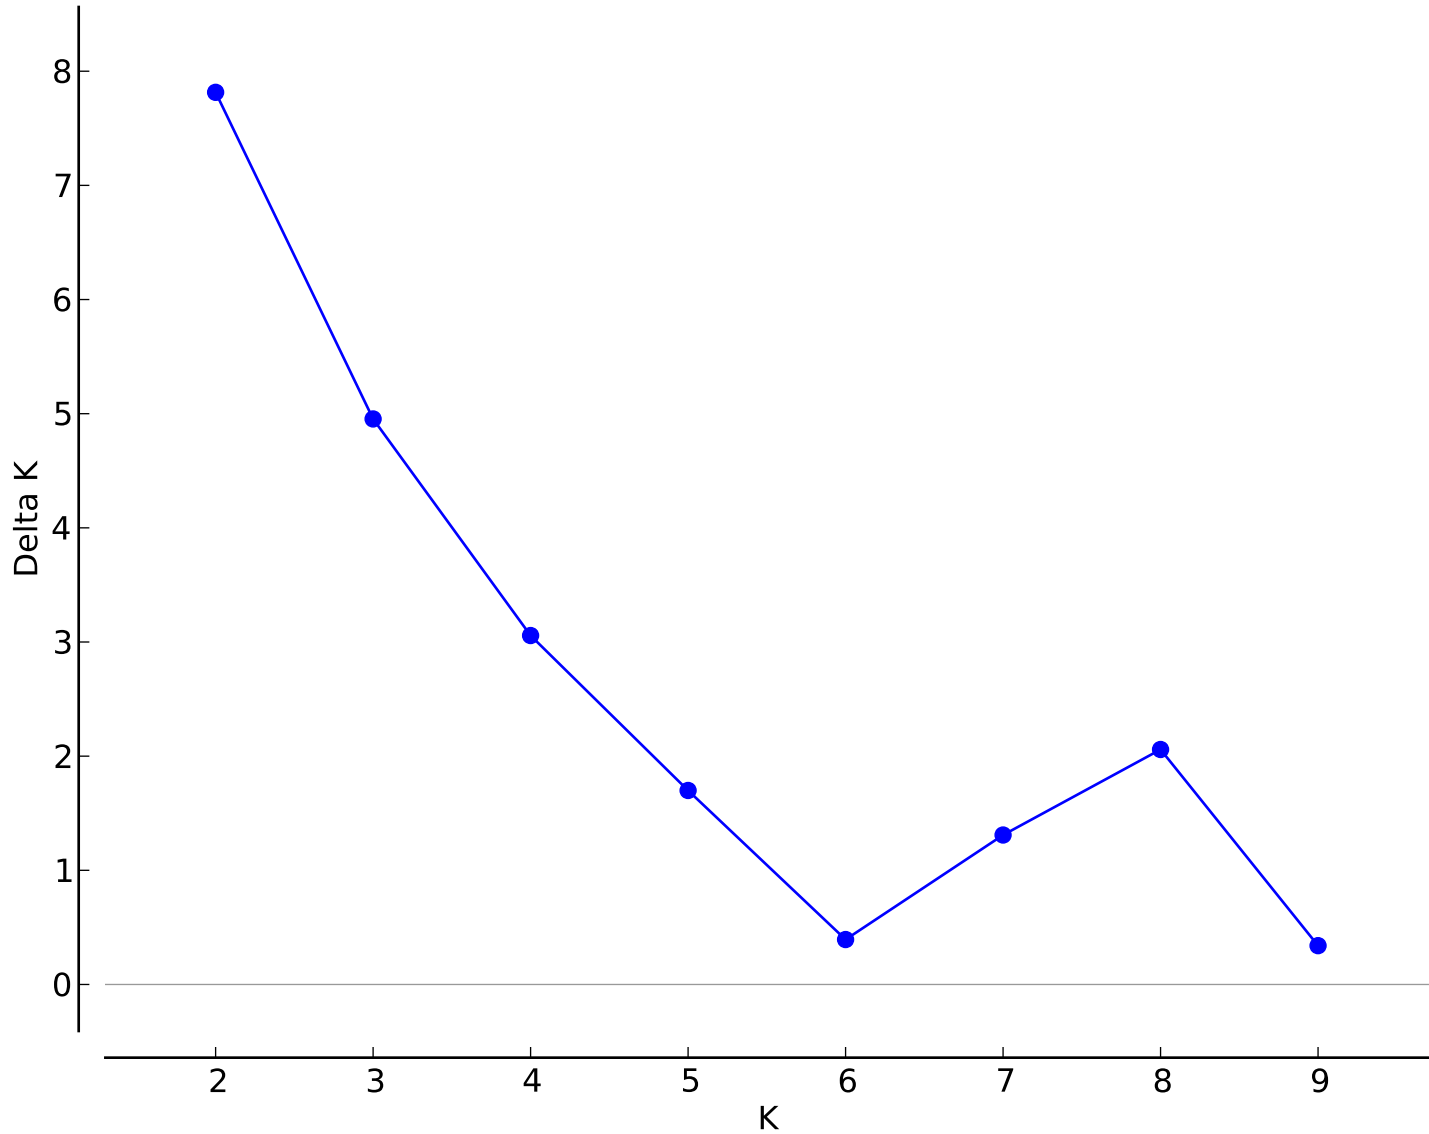

Supplement: DataSheet_2.pdf [file DataSheet_2.pdf]
